# Supplementary material for: YQFC: a web tool to compare quantitative biological features between two yeast gene lists
Source: Oxford University Press journal article supplement (doi:10.1093/database/baaa076), 2020-01-01
Supplement: baaa076_supp.zip [file baaa076_supp.zip]

**Supplementary Table 1.** The detailed sources of each individual feature.

| Feature Name                                                                                | Source          | Feature Name                                                                                                                                          | Source          | Feature Name                                                              | Source          |
|---------------------------------------------------------------------------------------------|-----------------|-------------------------------------------------------------------------------------------------------------------------------------------------------|-----------------|---------------------------------------------------------------------------|-----------------|
| 5'UTR length                                                                                | Nagalakshmi [2] | 3'UTR length                                                                                                                                          | Nagalakshmi [2] | Transcription level                                                       | Nagalakshmi [2] |
| Transcriptional frequency                                                                   | Holstege [1]    | mRNA expression level                                                                                                                                 | Holstege [1]    | mRNA half-life                                                            | Holstege [1]    |
| Transcriptional plasticity                                                                  | Lin [3]         | Translational efficiency                                                                                                                              | Csárdi [6]      | # of mRNA isoforms                                                        | Pelechano [4]   |
| Protein half-life                                                                           | Christiano [5]  | Protein abundance in normal/stress conditions <sup>a</sup>                                                                                            | Ho [7]          | # of interactors in the (PI, GI) networks                                 | BioGRID [11]    |
| CDS length                                                                                  | SGD [10]        | Amino acid composition                                                                                                                                | SGD [10]        | Atomic composition                                                        | SGD [10]        |
| Protein physical details (length, molecular weight, pI, aliphatic index, instability index) | SGD [10]        | Coding region translation calculation (codon bias, codon adaptation index, frequency of optimal codons, hydropathicity of protein, aromaticity score) | SGD [10]        | # of fungal homologs<br># of non-fungal and <i>S. cerevisiae</i> homologs | YeastMine [13]  |
| # of interactors in the (CC, CX, DC, GN, GT, HT, LC, PG, TS) networks                       | YeastNet [8]    | # of GO terms<br># of GO slim terms<br># of pathways<br># of domains<br># of publications<br># of mutant phenotypes                                   | SGD [10]        | # of PTMs<br># of transcriptional regulators                              | YeastMine [13]  |
| # of interactors in the (EPA, FAA, GIA, LEA, MPA, PIA, TFBA, TFRA) networks                 | YAGM [9]        | Extinction coefficients at 280nm (all Cys residues appear as half cystines, no Cys residues appear as half cystines)                                  | SGD [10]        | # of interactors in the EPA network                                       | SPELL [12]      |

<sup>a</sup>Ho *et al.* [7] collected 23 datasets of protein abundance measured in the normal growth condition from the literature. They also collected the datasets of protein abundance measured in 11 different stress conditions (dithiothreitol, H<sub>2</sub>O<sub>2</sub>, hydroxyurea, methyl methanesulfonate, etc.) from the literature.

**CDS:** coding sequence

**UTR:** untranslated region

**GO:** gene ontology

**PTM:** post-translational modification,

**pI:** isoelectric point,

**PI:** physical interaction,

**GI:** genetic interaction,

**CC:** inferred links by co-citation of two genes across 46,111 pubmed Medline article abstracts for yeast biology from YeastNet,

**CX:** inferred links by co-expression pattern of two genes (based on high-dimensional gene expression data) from YeastNet,

**DC:** inferred links by co-occurrence of protein domains between two coding genes from YeastNet

**GN:** inferred links by similar genomic context of bacterial orthologs of two yeast genes from YeastNet

**GT:** inferred links by similar profiles of genetic interaction partners from YeastNet

**HT:** links by high-throughput protein-protein interactions

**LC:** links by small/medium-scale protein-protein interactions (collected from protein-protein interaction data bases)

**PG:** Inferred links by similar phylogenetic profiles between two yeast genes from YeastNet

**TS:** inferred links by 3-D protein structure of interacting orthologous proteins between two yeast proteins from YeastNet

**EPA:** expression profile association

**FAA:** functional annotation association

**GIA:** genetic interaction association

**LEA:** literature evidence association,

**MPA:** mutant phenotype association

**PIA:** physical interaction association

**TFBA:** transcription factor binding association

**TFRA:** transcription factor regulation association

## References

1. Holstege,F.C., Jennings,E.G., Wyrick,J.J. *et al.* (1998) Dissecting the regulatory circuitry of a eukaryotic genome. *Cell*, **95(5)**, 717-728.
2. Nagalakshmi,U., Wang,Z., Waern,K. *et al.* (2008) The transcriptional landscape of the yeast genome defined by RNA sequencing. *Science*, **320(5881)**, 1344-1349.
3. Lin,Z., Wu,W.S., Liang,H. *et al.* (2010) The spatial distribution of cis regulatory elements in yeast promoters and its implications for transcriptional regulation. *BMC Genomics*, **11**, 581.
4. Pelechano,V., Wei,W. and Steinmetz,L.M. (2013) Extensive transcriptional heterogeneity revealed by isoform profiling. *Nature*, **497(7447)**, 127-131.
5. Christiano,R., Nagaraj,N., Fröhlich,F. *et al.* (2014) Global proteome turnover analyses of the Yeasts *S. cerevisiae* and *S. pombe*. *Cell Rep.*, **9(5)**, 1959-1965.
6. Csárdi,G., Franks,A., Choi,D.S. *et al.* (2015) Accounting for experimental noise reveals that mRNA levels, amplified by post-transcriptional processes, largely determine steady-state protein levels in yeast. *PLoS Genet.*, **11(5)**, e1005206.
7. Ho,B., Baryshnikova,A. and Brown,G.W. (2018) Unification of Protein Abundance Datasets Yields a Quantitative *Saccharomyces cerevisiae* Proteome. *Cell Syst.*, **6(2)**, 192-205.
8. Kim,H., Shin,J., Kim,E. *et al.* (2014) YeastNet v3: a public database of data-specific and integrated functional gene networks for *Saccharomyces cerevisiae*. *Nucleic Acids Res.*, **42(D1)**, D731-D736.
9. Wu,W.S., Wang,C.C., Jhou,M.J. *et al.* (2015) YAGM: a web tool for mining associated genes in yeast based on diverse biological associations. *BMC Syst Biol.*, **9(Suppl 6)**, S1.
10. Lang,O.W., Nash,R.S., Hellerstedt,S.T. *et al.* (2018) An Introduction to the *Saccharomyces* Genome Database (SGD). *Methods Mol. Biol.*, **1757**, 21-30.
11. Oughtred,R., Stark,C., Breitkreutz,B.J. *et al.* (2019) The BioGRID interaction database: 2019 update. *Nucleic Acids Res.*, **47(D1)**, D529-D541.
12. Hibbs,M.A., Hess,D.C., Myers,C.L. *et al.* (2007) Exploring the functional landscape of gene expression: directed search of large microarray compendia. *Bioinformatics*, **23(20)**, 2692-2699.

13. Balakrishnan,R., Park,J., Karra,K. *et al.* (2012) YeastMine--an integrated data warehouse for *Saccharomyces cerevisiae* data as a multipurpose tool-kit. *Database (Oxford)*, **2012**, bar062.
